# Supplementary material
Source: publisher figshare collection journal article supplement (https://gsajournals.figshare.com/ndownloader/files/21257535)

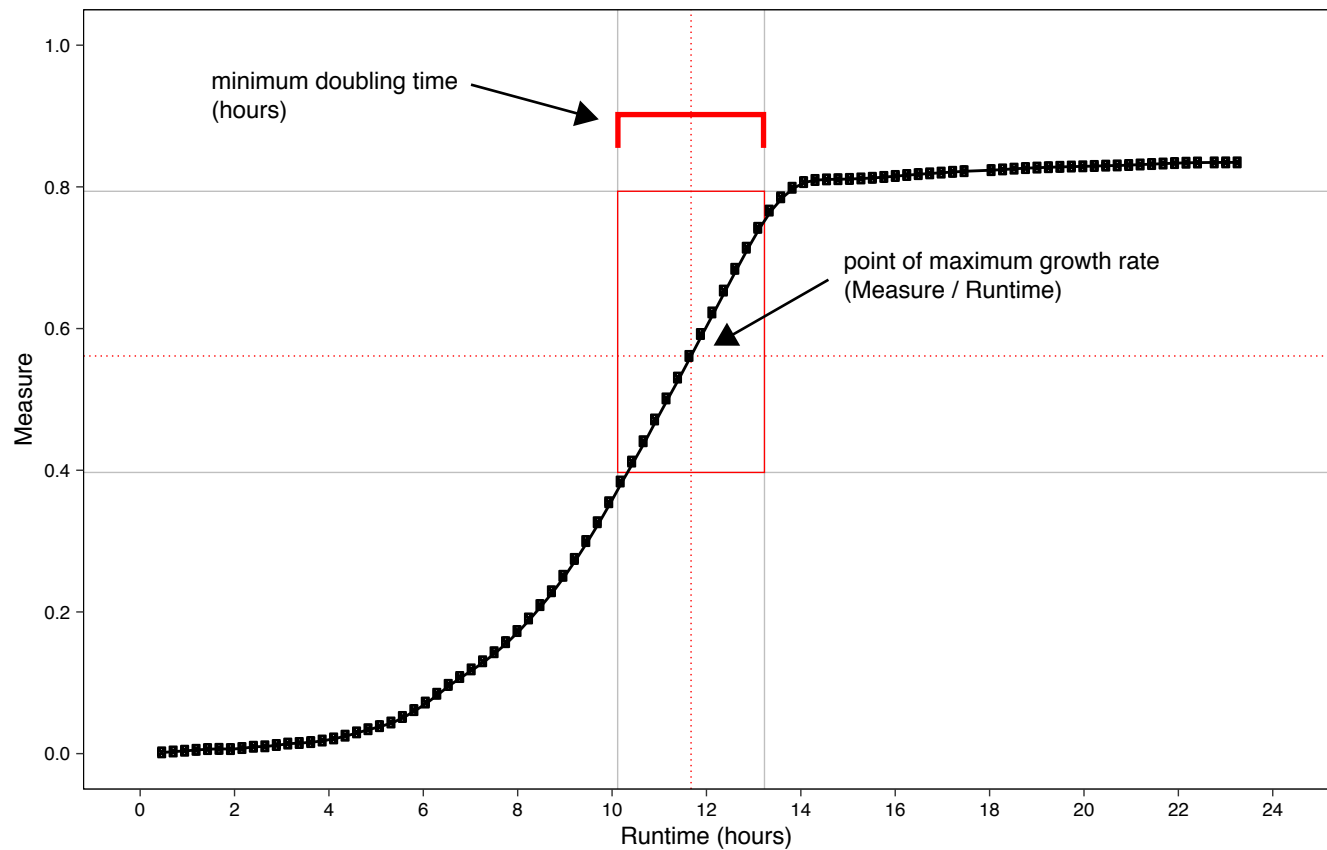

Supplement: Supplementary file 1 [file 21257535]
